# Supplementary material
Source: PubMed Central journal article supplement (PMC2726426)
Supplement: 0906370106_0906370106SI.pdf [file 0906370106_0906370106SI.pdf]

# Supporting Information

Niles et al. 10.1073/pnas.0906370106

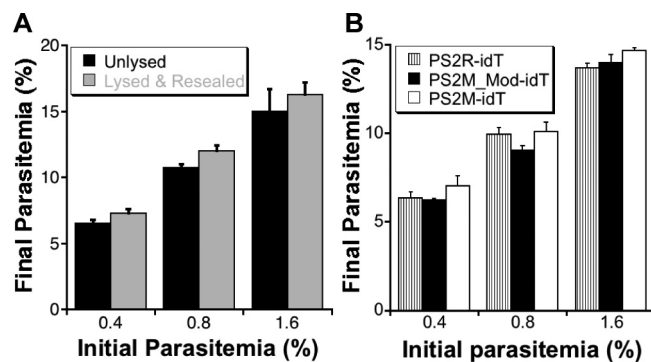

**Fig. S1.** (A) Parasites infect and grow equally well in sham-loaded (lysed and resealed using the HL/R procedure) as intact erythrocytes. (B) Excluding RBC bound aptamer as an explanation for aptamer induced toxicity. Erythrocytes were incubated in isotonic buffer (no lysis) under conditions simulating loading with 300  $\mu$ M *PS2R-idT*, *PS2M\_Mod-idT* and *PS2M-idT*, washed exactly according to the post resealing step of the HL/R protocol and used in parasite growth assays.

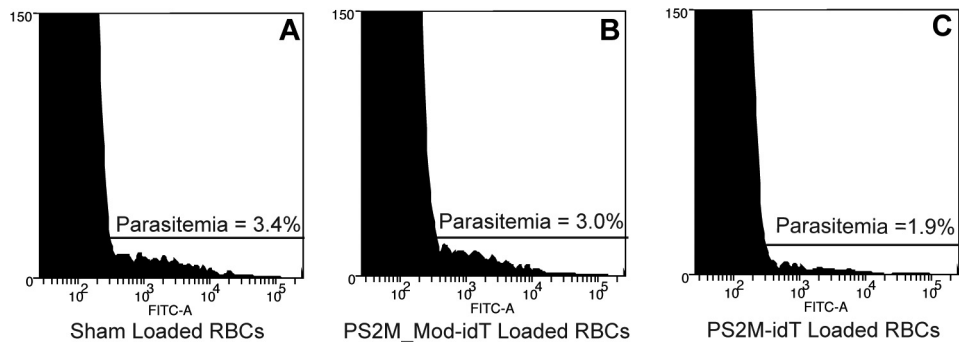

**Fig. S2.** Several representative FACS histograms used to determine parasite growth in experiments with: (A) Sham-loaded RBCs; (B) control oligonucleotide *PS2M\_Mod-idT* (300  $\mu$ M) preloaded RBCs; and (C) heme-binding aptamer *PS2M-idT* (300  $\mu$ M)-preloaded RBCs.
